# Supplementary figures and images for: The pharmacokinetics, efficacy, and safety of a novel selective‐dose cannabis inhaler in patients with chronic pain: A randomized, double‐blinded, placebo‐controlled trial
Source: PubMed Central journal article supplement — Eur J Pain. 2020 Jun 12;24(8):1505–16. doi: 10.1002/ejp.1605 (PMC7496774; doi:10.1002/ejp.1605), 2020-06-12

● 1.0-0.5 ◆ 1.0-0.0 ■ 0.5-0.0

P-value  
(Comparing  
Doses)

P-value  
(Comparing  
Doses)

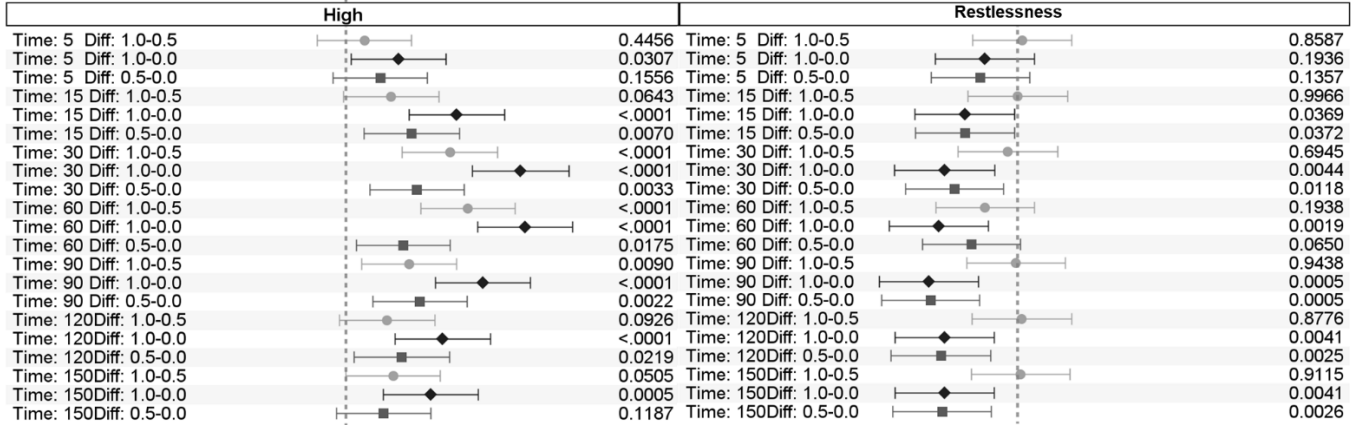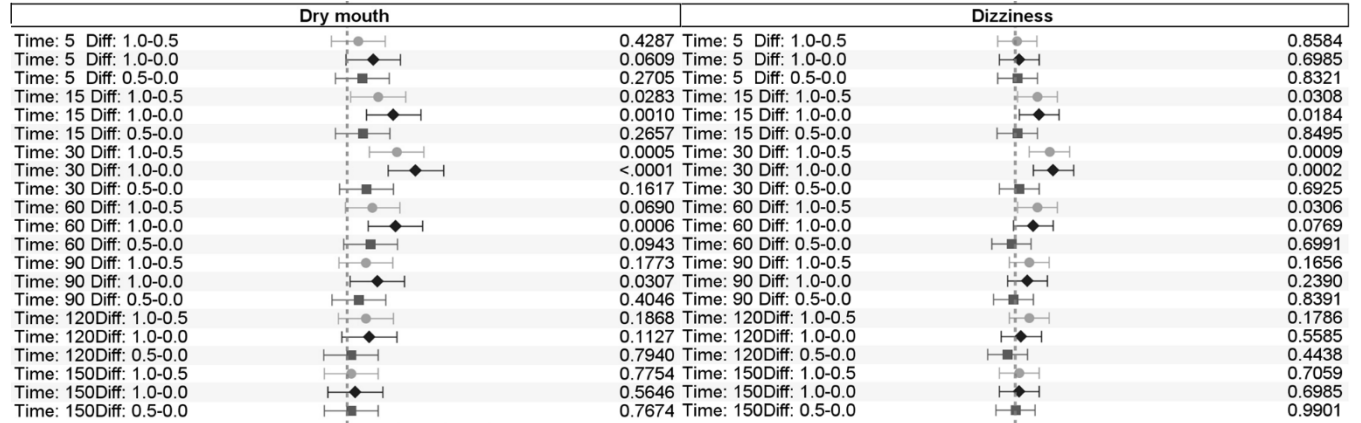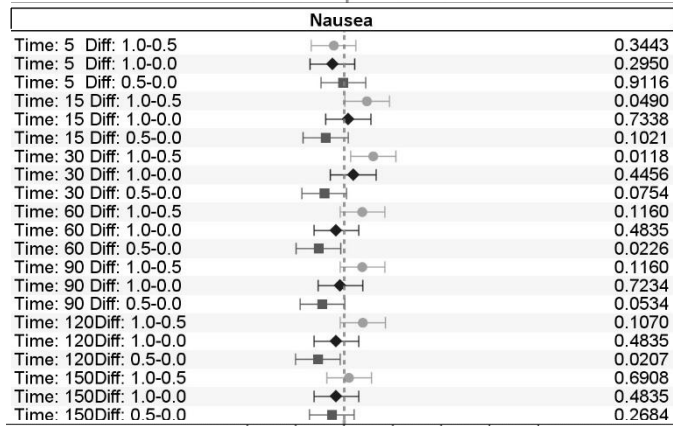

-2 0 2 4

LSMean difference ± 95% CL

Supplement: EJP-24-1505-s001.pdf [file EJP-24-1505-s001.pdf]
